# Supplementary material
Source: publisher figshare collection journal article supplement (https://asha.figshare.com/articles/dataset/_/21844185)

**Supplemental Material S1.** Overall accuracy for each consonant cluster class at each time point, including performance across acquisition (practice session). Lines indicating baseline performance are provided to help visualize the change. Error bars are standard error.

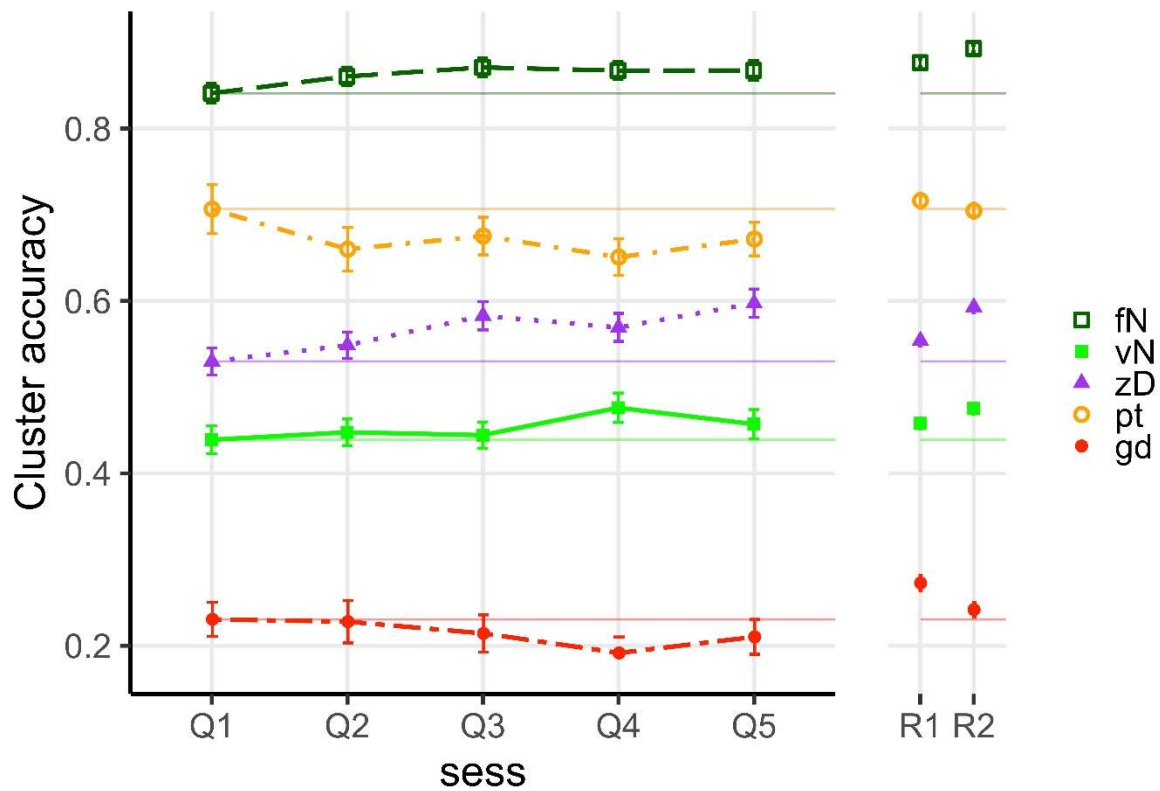

Supplement: Supplementary file 1 [file 1]
