# Supplementary material
Source: publisher figshare collection journal article supplement (https://asha.figshare.com/articles/dataset/_/21844185)

**Supplemental Material S3.** Overall nasal duration in correctly produced fN clusters at each time point, including performance across acquisition (practice session). Error bars represent standard error.

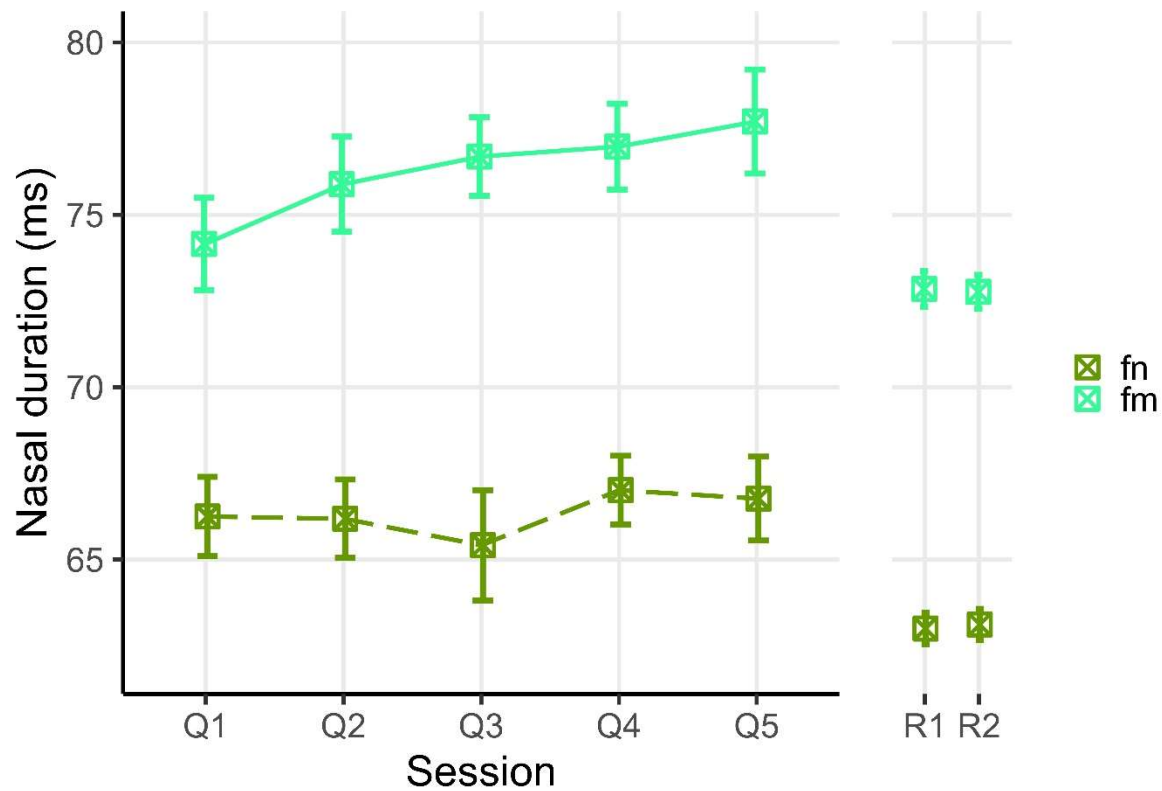

Supplement: Supplementary file 3 [file 1]
